# Supplementary material
Source: Springer Nature journal article supplement (https://www.springermedizin.de/resource/supplementary/12885_2013_4326_MOESM4_ESM.pdf/9468226)

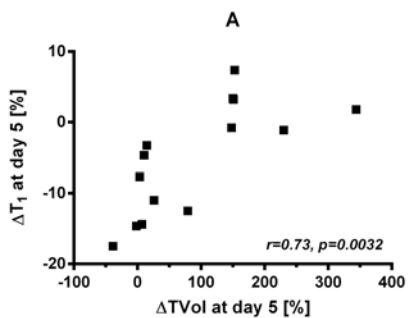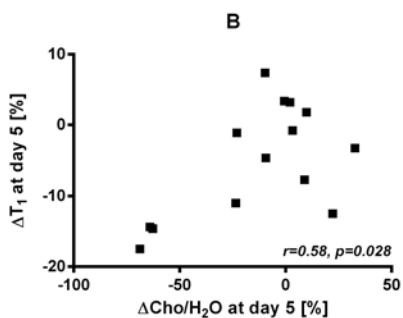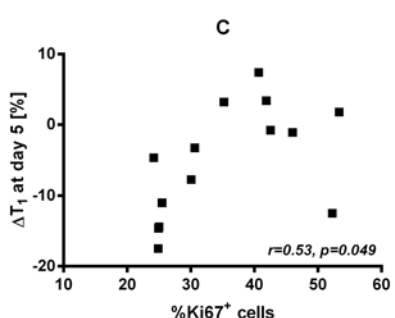

Supplement: MOESM4 [file 9468226]
